# Supplementary material
Source: PubMed Central journal article supplement (PMC4761535)
Supplement: NIHMS717742-supplement-10439_2015_1431_MOESM1_ESM.pdf [file NIHMS717742-supplement-10439_2015_1431_MOESM1_ESM.pdf]

## Electronic Supplementary Material

Cellular and Nuclear Alignment Analysis for Determining Epithelial Cell Chirality

Michael J. Raymond, Jr.<sup>1</sup>, Poulomi Ray<sup>1,2</sup>, Gurleen Kaur<sup>3</sup>, Ajay V. Singh<sup>1,2</sup>, Leo Q. Wan<sup>1,2,4\*</sup>

1 Department of Biomedical Engineering

2 Center for Biotechnology & Interdisciplinary Studies

3 Department of Biology

4 Center for Modeling, Simulation and Imaging in Medicine

Rensselaer Polytechnic Institute

110 8th Street, Troy NY 12180

\*Correspondence to:

Leo Q. Wan

Assistant Professor of Biomedical Engineering

Laboratory for Tissue Engineering and Morphogenesis

2147 Center for Biotechnology & Interdisciplinary Studies

Rensselaer Polytechnic Institute

110 8th Street, Troy NY 12180

518-276-2505 (Office)

518-276-3035 (Fax)

wanq@rpi.edu

<http://www.rpi.edu/~wanq>

**Table S1.** Cell Alignment Data of Each Ring

| Ring ID | Alignment Angle (mean $\pm$ SEM) | CW         | CCW        | NC  | p Value |
|---------|----------------------------------|------------|------------|-----|---------|
| 1       | 1.07 $\pm$ 2.65                  | 73         | 76         | 17  | 8.1E-01 |
| 2       | 5.02 $\pm$ 2.39                  | 123        | 152        | 37  | 8.0E-02 |
| 3       | 13.58 $\pm$ 2.02                 | 75         | <b>199</b> | 34  | 6.8E-14 |
| 4       | 5.22 $\pm$ 2.29                  | 95         | <b>140</b> | 32  | 3.3E-03 |
| 5       | 12.97 $\pm$ 2.03                 | 84         | <b>204</b> | 32  | 1.5E-12 |
| 6       | 15.42 $\pm$ 1.97                 | 71         | <b>205</b> | 34  | 7.3E-16 |
| 7       | 13.26 $\pm$ 1.99                 | 80         | <b>215</b> | 27  | 3.8E-15 |
| 8       | 4.42 $\pm$ 2.10                  | 139        | 162        | 39  | 1.9E-01 |
| 9       | 1.31 $\pm$ 2.32                  | 134        | 121        | 32  | 4.2E-01 |
| 10      | 19.47 $\pm$ 1.79                 | 34         | <b>185</b> | 28  | 1.9E-24 |
| 11      | 18.65 $\pm$ 1.78                 | 37         | <b>186</b> | 35  | 1.9E-23 |
| 12      | 1.50 $\pm$ 2.71                  | 86         | 104        | 31  | 1.9E-01 |
| 13      | -9.57 $\pm$ 1.47                 | <b>323</b> | 168        | 68  | 2.7E-12 |
| 14      | 6.93 $\pm$ 1.97                  | 107        | <b>166</b> | 47  | 3.6E-04 |
| 15      | 13.66 $\pm$ 2.48                 | 81         | <b>172</b> | 24  | 1.1E-08 |
| 16      | 9.36 $\pm$ 2.06                  | 85         | <b>174</b> | 33  | 3.2E-08 |
| 17      | 9.21 $\pm$ 1.81                  | 129        | <b>243</b> | 38  | 3.4E-09 |
| 18      | 15.28 $\pm$ 2.61                 | 70         | <b>156</b> | 22  | 1.1E-08 |
| 19      | 13.29 $\pm$ 2.49                 | 52         | <b>132</b> | 27  | 3.7E-09 |
| 20      | 2.99 $\pm$ 2.01                  | 158        | 176        | 52  | 3.3E-01 |
| 21      | -2.87 $\pm$ 2.72                 | 133        | 110        | 26  | 1.4E-01 |
| 22      | -1.22 $\pm$ 2.36                 | 99         | 111        | 25  | 4.1E-01 |
| 23      | 8.83 $\pm$ 2.35                  | 87         | <b>159</b> | 44  | 4.4E-06 |
| 24      | 23.57 $\pm$ 2.18                 | 35         | <b>178</b> | 12  | 1.2E-22 |
| 25      | 7.13 $\pm$ 2.25                  | 118        | <b>191</b> | 34  | 3.3E-05 |
| 26      | 4.94 $\pm$ 1.50                  | 173        | <b>269</b> | 78  | 4.0E-06 |
| 27      | 16.79 $\pm$ 1.63                 | 136        | <b>331</b> | 51  | 1.8E-19 |
| 28      | 10.48 $\pm$ 1.74                 | 151        | <b>298</b> | 64  | 4.0E-12 |
| 29      | 6.76 $\pm$ 1.39                  | 229        | <b>427</b> | 78  | 1.1E-14 |
| 30      | -4.04 $\pm$ 1.59                 | <b>303</b> | 241        | 68  | 7.9E-03 |
| 31      | -4.92 $\pm$ 1.47                 | <b>302</b> | 221        | 50  | 4.0E-04 |
| 32      | -5.97 $\pm$ 1.15                 | <b>424</b> | 289        | 106 | 4.3E-07 |
| 33      | -6.16 $\pm$ 1.55                 | <b>255</b> | 201        | 57  | 1.1E-02 |
| 34      | 0.56 $\pm$ 2.21                  | 173        | 168        | 52  | 7.9E-01 |
| 35      | 0.85 $\pm$ 1.79                  | 260        | 279        | 48  | 4.1E-01 |
| 36      | 1.10 $\pm$ 2.01                  | 178        | 195        | 50  | 3.8E-01 |
| 37      | -0.91 $\pm$ 1.98                 | 208        | 218        | 47  | 6.3E-01 |
| 38      | 4.82 $\pm$ 1.64                  | 267        | <b>341</b> | 57  | 2.7E-03 |

CW: clockwise alignment, CCW: counter-clockwise alignment, and NC: not significantly biased to CW or CCW.

**Table S2.** Nuclear Alignment Data of Each Ring

| Ring ID | Alignment Angle (mean $\pm$ SEM) | CW         | CCW        | NC | p Value |
|---------|----------------------------------|------------|------------|----|---------|
| 1       | -7.41 $\pm$ 3.11                 | 80         | 67         | 19 | 2.8E-01 |
| 2       | 1.71 $\pm$ 2.61                  | 138        | 146        | 28 | 6.4E-01 |
| 3       | 8.32 $\pm$ 2.38                  | 96         | <b>181</b> | 31 | 3.3E-07 |
| 4       | 1.50 $\pm$ 2.53                  | 112        | 120        | 35 | 6.0E-01 |
| 5       | 5.59 $\pm$ 2.42                  | 105        | <b>176</b> | 39 | 2.3E-05 |
| 6       | 13.18 $\pm$ 2.20                 | 88         | <b>195</b> | 27 | 2.0E-10 |
| 7       | 11.82 $\pm$ 2.09                 | 94         | <b>198</b> | 30 | 1.2E-09 |
| 8       | -0.19 $\pm$ 2.45                 | 151        | 160        | 29 | 6.1E-01 |
| 9       | 4.34 $\pm$ 2.47                  | 127        | 134        | 26 | 6.7E-01 |
| 10      | 9.56 $\pm$ 2.36                  | 66         | <b>152</b> | 29 | 5.7E-09 |
| 11      | 9.06 $\pm$ 2.32                  | 73         | <b>146</b> | 39 | 8.1E-07 |
| 12      | -2.28 $\pm$ 3.02                 | 104        | 96         | 21 | 5.7E-01 |
| 13      | -6.22 $\pm$ 1.84                 | <b>284</b> | 229        | 46 | 1.5E-02 |
| 14      | 5.22 $\pm$ 2.19                  | 122        | <b>164</b> | 34 | 1.3E-02 |
| 15      | 9.20 $\pm$ 2.72                  | 95         | <b>155</b> | 27 | 1.5E-04 |
| 16      | 5.11 $\pm$ 2.46                  | 118        | <b>153</b> | 21 | 3.4E-02 |
| 17      | 3.19 $\pm$ 2.05                  | 169        | 203        | 38 | 7.8E-02 |
| 18      | 5.71 $\pm$ 2.87                  | 95         | <b>130</b> | 23 | 2.0E-02 |
| 19      | 10.34 $\pm$ 2.65                 | 66         | <b>117</b> | 28 | 1.6E-04 |
| 20      | 4.38 $\pm$ 2.31                  | 151        | <b>199</b> | 36 | 1.0E-02 |
| 21      | 0.29 $\pm$ 2.89                  | 119        | 132        | 18 | 4.1E-01 |
| 22      | 11.47 $\pm$ 2.61                 | 67         | <b>138</b> | 30 | 7.1E-07 |
| 23      | 1.10 $\pm$ 2.73                  | 120        | 141        | 29 | 1.9E-01 |
| 24      | -0.84 $\pm$ 3.21                 | 105        | 103        | 17 | 8.9E-01 |
| 25      | 3.83 $\pm$ 2.56                  | 121        | <b>156</b> | 32 | 3.6E-02 |
| 26      | 10.00 $\pm$ 2.14                 | 154        | <b>247</b> | 41 | 3.4E-06 |
| 27      | -0.49 $\pm$ 1.93                 | 204        | 214        | 49 | 6.3E-01 |
| 28      | 6.64 $\pm$ 1.92                  | 159        | <b>238</b> | 52 | 7.3E-05 |
| 29      | 5.07 $\pm$ 1.65                  | 244        | <b>349</b> | 63 | 1.6E-05 |
| 30      | -2.41 $\pm$ 1.80                 | 254        | 220        | 70 | 1.2E-01 |
| 31      | -0.12 $\pm$ 1.90                 | 241        | 240        | 42 | 9.6E-01 |
| 32      | -2.78 $\pm$ 1.67                 | 350        | 301        | 62 | 5.5E-02 |
| 33      | -1.01 $\pm$ 1.99                 | 216        | 191        | 49 | 2.2E-01 |
| 34      | -0.44 $\pm$ 2.41                 | 158        | 152        | 31 | 7.3E-01 |
| 35      | 1.42 $\pm$ 1.95                  | 237        | 262        | 40 | 2.6E-01 |
| 36      | -2.35 $\pm$ 2.27                 | 176        | 165        | 32 | 5.5E-01 |
| 37      | -0.08 $\pm$ 2.23                 | 197        | 189        | 40 | 6.8E-01 |
| 38      | 4.57 $\pm$ 1.89                  | 245        | <b>315</b> | 48 | 3.1E-03 |

CW: clockwise alignment, CCW: counter-clockwise alignment, and NC: not significantly biased to CW or CCW.

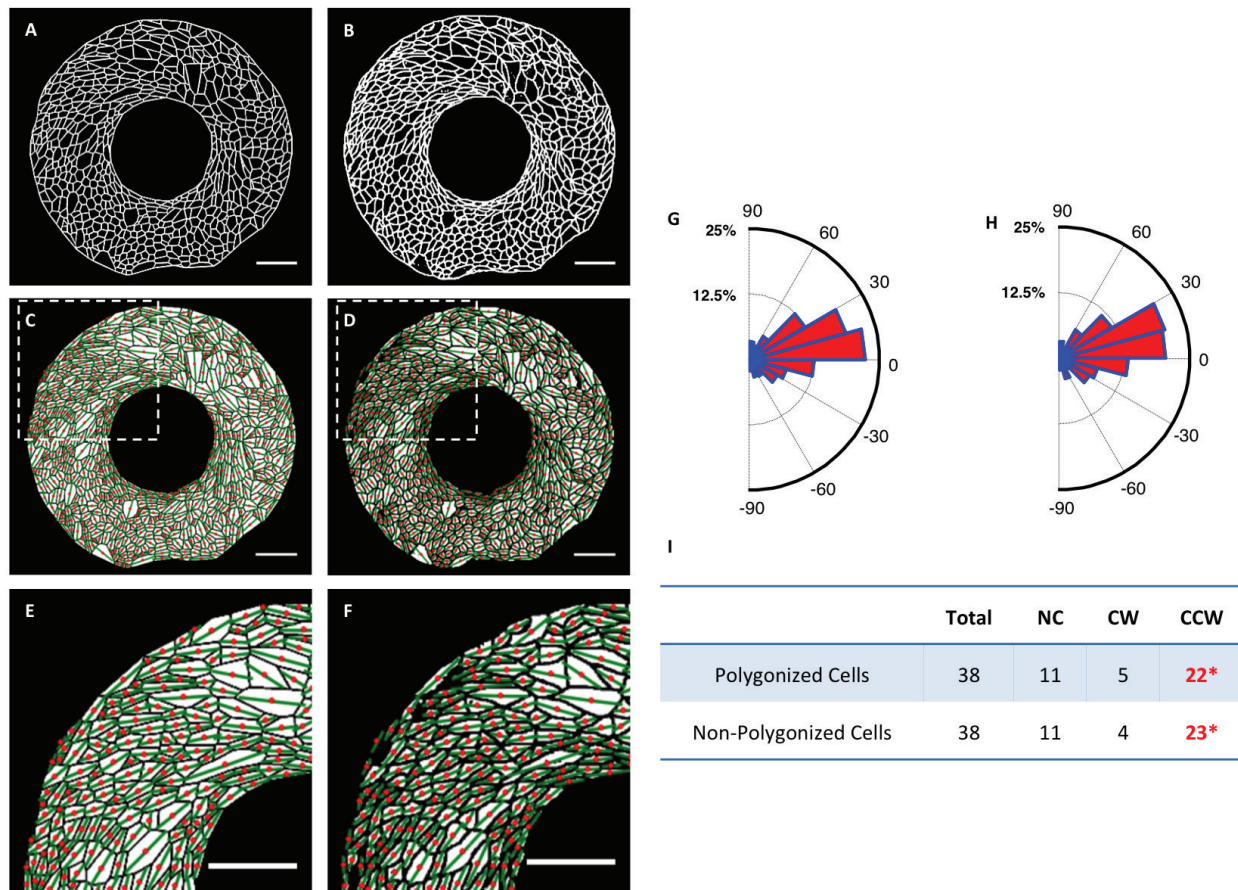

**Figure S1.** Chirality analyses based on polygonized and non-polygonized images. Scale bars = 100  $\mu\text{m}$ . **(A)** Polygonized cell image. **(B)** Non-polygonized cell image. **(C-D)** Alignment of the cells in polygonized and non-polygonized images indicated by green lines over cell centroid (red dots), respectively. **(E-F)** Region of interest of C-D. **(G-H)** Rose diagrams of alignment angle distributions. **(I)** Table for chirality analysis of polygonized and non-polygonized images. \* Significant bias towards CCW among chiral rings.

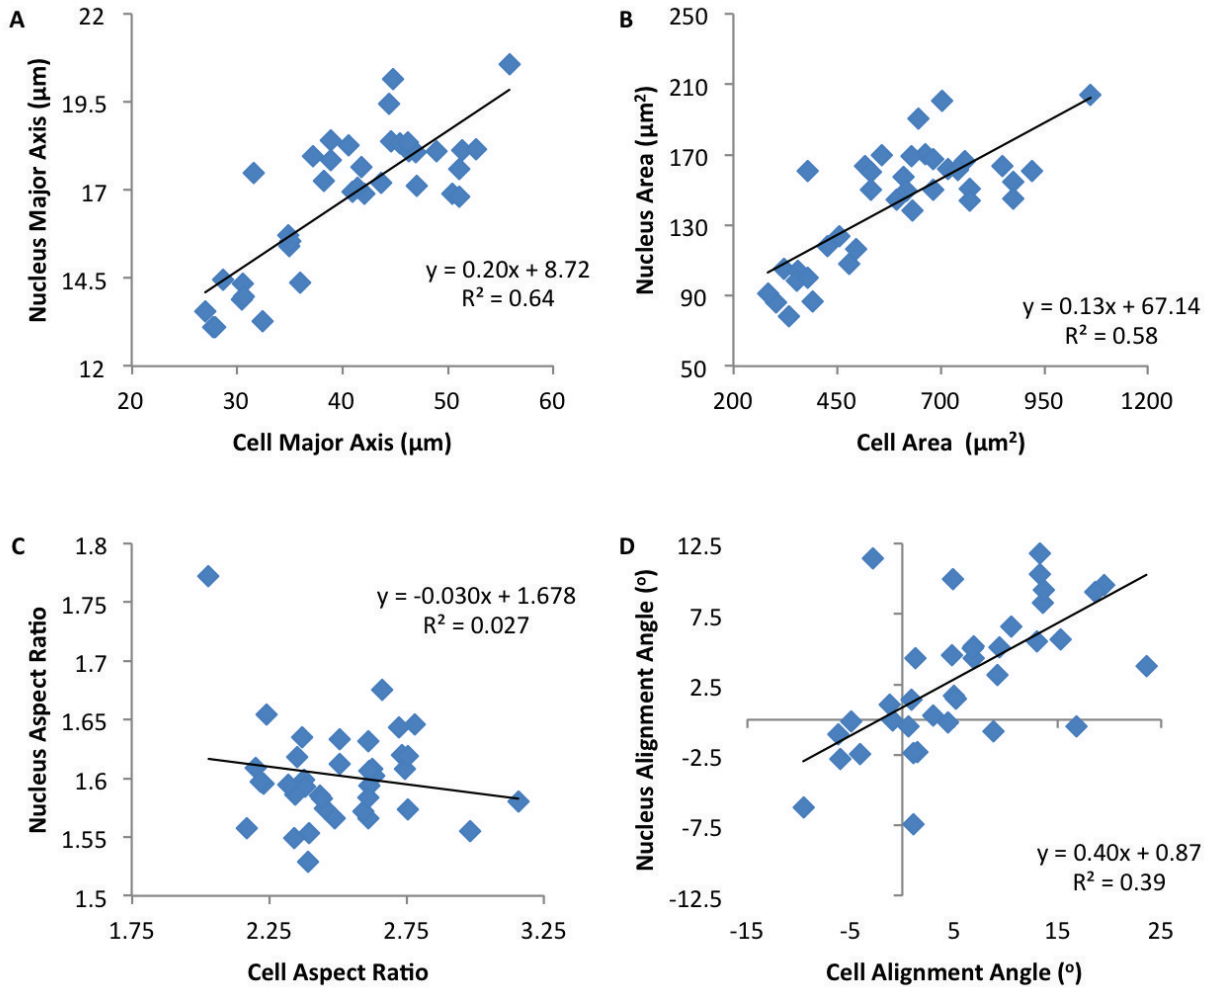

**Figure S2.** Correlations between cellular and nuclear morphological parameter: (A) Major axis length of cells vs nuclei, (B) Cellular vs nuclear area, (C) Aspect ratio, and (D) Alignment angles. Strong correlations ( $R^2 > 0.5$ ) in major axis length, area, and alignment angles between cells and their nuclei were observed.
